# Supplementary material for: 3D assembly of preformed colloidal nanoparticles into gels and aerogels: function-led design
Source: Royal Society of Chemistry journal article supplement (doi:10.1039/c7cc03862c), 2017-01-01
Supplement: c7cc03862c1.pdf [file c7cc03862c1.pdf]

## Supporting Information

### 3D Assembly of Preformed Colloidal Nanoparticles into Gels and Aerogels: Function-led Design

*Dan Wen\* and Alexander Eychmüller\**

**Table S1.** BET surface area values and density of various aerogels presented.

| Aerogel component | Sample abbreviation                                 | surface area (m <sup>2</sup> g <sup>-1</sup> ) | density (g cm <sup>-3</sup> ) |
|-------------------|-----------------------------------------------------|------------------------------------------------|-------------------------------|
| Metal             | Pd <sup>1</sup>                                     | 40–108                                         | 0.025–0.059                   |
|                   | β-CD-Pd <sup>2</sup>                                | 92                                             | 0.066                         |
|                   | PdPt <sup>3</sup>                                   | 73–86                                          | ---                           |
|                   | Pd <sub>83</sub> Ni <sub>17</sub> <sup>4</sup>      | 29.8                                           | 0.12                          |
|                   | MCu (M=Pd, Pt, Au) <sup>5</sup>                     | 21.3–37.5                                      | ---                           |
|                   | PtNi <sup>6</sup>                                   | 55–58                                          | ---                           |
|                   | Pd <sub>83</sub> Ni <sub>17</sub> HNS <sup>7</sup>  | 95.4                                           | 0.035                         |
|                   | Ni-Pd <sub>x</sub> Pt <sub>y</sub> <sup>8</sup>     | 95.4–67.7                                      | 0.035–0.050                   |
|                   | PtAg NTAGs <sup>9</sup>                             | 24.7–83.4                                      | 0.165–0.3                     |
|                   | Au <sup>10</sup>                                    | 50.1                                           | 0.040                         |
|                   | Cu <sup>11</sup>                                    | ---                                            | 0.0043–0.0075                 |
|                   | Au/Ag <sup>12</sup>                                 | 67–73                                          | 0.051–0.055                   |
| QD                | CdS <sup>13</sup>                                   | 245                                            | 0.07                          |
|                   | CdSe <sup>13</sup>                                  | 143                                            | ---                           |
|                   | ZnS <sup>13</sup>                                   | 192                                            | 0.35                          |
|                   | PbS <sup>13</sup>                                   | 130                                            | ---                           |
|                   | BiTe <sub>3</sub> <sup>14</sup>                     | 36                                             | ---                           |
|                   | BixSb <sub>2-x</sub> Te <sub>3</sub> <sup>15</sup>  | 45                                             | ---                           |
| Metal Oxide       | Cryptomelane <sup>16</sup>                          | 80                                             | 0.0029                        |
|                   | Y <sub>2</sub> O <sub>3</sub> <sup>17</sup>         | 445                                            | 0.15                          |
| hybrids           | Au-TiO <sub>2</sub> <sup>18</sup>                   | 405                                            | ---                           |
|                   | TiO <sub>2</sub> -WO <sub>x</sub> -Au <sup>19</sup> | 473                                            | ---                           |
|                   | Pt-rGO-TiO <sub>2</sub> <sup>20</sup>               | 480/498                                        | ---                           |
|                   | Ag-MnO <sub>2</sub> <sup>21</sup>                   | 124.7                                          | ---                           |

|  |                                                                      |        |             |
|--|----------------------------------------------------------------------|--------|-------------|
|  | Pd/ZnO <sup>22</sup>                                                 | 55–248 | ---         |
|  | ZnPd/ZnO <sup>22</sup>                                               | 23–33  | ---         |
|  | Au/Fe <sub>3</sub> O <sub>4</sub> -GO-MoS <sub>2</sub> <sup>23</sup> | 164.4  | 0.5382      |
|  | CdS-Ag <sup>24</sup>                                                 | 73–165 | ---         |
|  | CdTe-Au (1:1) <sup>25</sup>                                          | 130    | ---         |
|  | CdSe/Ag <sup>26</sup>                                                | 69–210 | 0.032–0.072 |

## References

- 1 D. Wen, A.-K. Herrmann, L. Borchardt, F. Simon, W. Liu, S. Kaskel and A. Eychmüller, *J. Am. Chem. Soc.*, 2014, **136**, 2727.
- 2 W. Liu, A.-K. Herrmann, D. Geiger, L. Borchardt, F. Simon, S. Kaskel, N. Gaponik and A. Eychmüller, *Angew. Chem., Int. Ed.*, 2012, **51**, 5743.
- 3 W. Liu, P. Rodriguez, L. Borchardt, A. Foelske, J. Yuan, A. K. Herrmann, D. Geiger, Z. Zheng, S. Kaskel, N. Gaponik, R. Kotz, T. J. Schmidt and A. Eychmüller, *Angew. Chem. Int. Ed.*, 2013, **52**, 9849.
- 4 C. Z. Zhu, D. Wen, M. Oschatz, M. Holzschuh, W. Liu, A.-K. Herrmann, F. Simon, S. Kaskel and A. Eychmüller, *Small*, 2015, **11**, 1430.
- 5 C. Z. Zhu, Q. R. Shi, S. F. Fu, J. H. Song, H. B. Xia, D. Du and Y. H. Lin, *Adv. Mater.*, 2016, **28**, 8779.
- 6 S. Henning, L. Kühn, J. Herranz, J. Durst, T. Binninger, M. Nachtegaal, M. Werheid, W. Liu, M. Adam, S. Kaskel, A. Eychmüller and T. J. Schmidt, *J. Electrochem. Soc.*, 2016, **163**, 998.
- 7 B. Cai, D. Wen, W. Liu, A.-K. Herrmann, A. Benad and A. Eychmüller, *Angew. Chem. Int. Ed.*, 2015, **54**, 13101.
- 8 B. Cai, A. Dianat, R. Hübner, W. Liu, D. Wen, A. Benad, L. Sonntag, T. Gemming, G. Cuniberti and A. Eychmüller, DOI: 10.1002/adma.201605254.
- 9 W. Liu, D. Haubold, B. Rutkowski, M. Oschatz, R. Hübner, M. Werheid, C. Ziegler, L. Sonntag, S. H. Liu, Z. K. Zheng, A.-K. Herrmann, D. Geiger, B. Terlan, T. Gemming, L. Borchardt, S. Kaskel, A. Czyska-Filemonowicz and A. Eychmüller, *Chem. Mater.*, 2016, **28**, 6477.
- 10 D. Wen, W. Liu, D. Haubold, C. Z. Zhu, M. Oschatz, M. Holzschuh, A. Wolf, F. Simon, S. Kaskel and A. Eychmüller, *ACS Nano*, 2016, **10**, 2559.

- 11 X. J. Xu, R. R. Wang, P. Nie, Y. Cheng, X. Y. Lu, L. J. Shi and J. Sun, *ACS Appl. Mater. Interfaces*, 2017, **9**, 14273.
- 12 X. N. Gao, R. J. A. Esteves, L. Nahar, J. Nowaczyk and I. U. Arachchige, *ACS Appl. Mater. Interfaces*, 2016, **8**, 13076.
- 13 J. L. Mohanan, I. U. Arachchige and S. L. Brock, *Science*, 2005, **307**, 397.
- 14 S. Ganguly, C. Zhou, D. Morelli, J. Sakamoto and S. L. Brock, *J. Phys. Chem. C*, 2012, **116**, 17431.
- 15 S. M. Jung, H. Y. Jung, W. J. Fang, M. S. Dresselhaus and J. Kong, *Nano Lett.*, 2014, **14**, 1810.
- 16, J. W. Liu, H. P. Cong, L. Xue, M. N. Arshad, H. A. Albar, T. R. Sobahi, Q. Gao and S. H. Yu, *Chem. Sci.*, 2015, **6**, 2511.
- 17 W. Cheng, F. Rechberger and M. Niederberger, *ACS Nano*, 2016, **10**, 2467.
- 18 F. J. Heiligttag, M. D. Rossell, M. J. Süess and M. Niederberger, *J. Mater. Chem.*, 2011, **21**, 16893.
- 19 F. J. Heiligttag, W. Cheng, V. R. de Mendonça, M. J. Süess, K. Hametner, D. Günther, C. Ribeiro and M. Niederberger, *Chem. Mater.*, 2014, **26**, 5576.
- 20 R. O. da Silva, F. J. Heiligttag, M. Karnahla., H. Junge, M. Niederberger and S. Wohlra, *Catalysis Today*, 2015, **246**, 101.
- 21 H. J. Zhang, C. Lin, T. Han, F. P. Du, Y. H. Zhao, X. P. Li and Y. H. Sun, *ACS Sustainable Chem. Eng.*, 2016, **4**, 6277.
- 22 C. Ziegler, S. Klosz, L. Borchardt, M. Oschatz, S. Kaskel, M. Friedrich, R. Kriegel, T. Keilhauer, M. Armbrüster and A. Eychmüller, *Adv. Funct. Mater.*, 2016, **26**, 1014.
- 23 L. H. Zhi, W. Zuo, F. J. Chen and B. D. Wang, *ACS Sustainable Chem. Eng.*, 2016, **4**, 3398.
- 24 S. K. Gill, L. J Hope-Weeks, *Chem. Commun.*, 2009, 4384.
- 25 V. Lesnyak, A. Wolf, A. Dubavik, L. Borchardt, S.V. Voitekhovich, N. Gaponik, S. Kaskel and A. Eychmüller, *J. Am. Chem. Soc.*, 2011, **133**, 13413.
- 26 L. Nahar, R. J A. Esteves, S. Hafiz, Ü. Özgür and I. U. Arachchige, *ACS Nano*, 2015, **9**, 9810.
